# Supplementary material for: miR‐128 Is Implicated in Stress Responses by Targeting MAFG in Skeletal Muscle Cells
Source: Hindawi journal article supplement (doi:10.1155/2017/9308310), 2017-01-01
Supplement: f2 [file 9308310.f2.pdf]

**miR-128 is implicated in stress responses by targeting MAFG in  
skeletal muscle cells**

Rocco Caggiano, Fabio Cattaneo, Ornella Molledo, Giovanni Esposito, Cinzia  
Perrino, Bruno Trimarco, Rosario Ammendola and Raffaella Faraonio

**SUPPLEMENTARY MATERIAL**

**Supplemental Table S1. List of putative redox-related targets of miR-128 predicted in human by *in silico* computational analysis**

| <b>Gene symbol</b>   | <b>Gene name</b>                                                                                     | <b>Accession number*</b> | <b>Prediction programs (conserved site/s among mammals)</b> |
|----------------------|------------------------------------------------------------------------------------------------------|--------------------------|-------------------------------------------------------------|
| <b><i>NFE2L</i></b>  | nuclear factor, erythroid 2-like<br>2                                                                | ENST00000397063.4        | TargetScan, MiRanda<br>RNAhybrid<br>(conserved site)        |
| <b><i>MAFG</i></b>   | musculoaponeurotic<br>fibrosarcoma oncogene<br>homolog G (avian)                                     | ENST00000357736.4H<br>M  | TargetScan, MiRanda<br>RNAhybrid<br>(conserved site)        |
| <b><i>MAFK</i></b>   | musculoaponeurotic<br>fibrosarcoma oncogene<br>homolog K (avian)                                     | ENST00000343242.4        | RNAhybrid                                                   |
| <b><i>MAFF</i></b>   | musculoaponeurotic<br>fibrosarcoma oncogene<br>homolog F (avian)                                     | ENST00000338483.2        | MiRanda, RNAhybrid                                          |
| <b><i>BACH1</i></b>  | BTB Domain and CNC<br>Homolog 1                                                                      | ENST00000286800.3        | TargetScan, MiRanda<br>RNAhybrid                            |
| <b><i>KEAP1</i></b>  | Kelch-like ECH-associated<br>protein 1                                                               | ENST00000171111.5        |                                                             |
| <b><i>HMOX1</i></b>  | heme oxygenase (decycling) 1                                                                         | ENST00000216117.8        | TargetScan, MiRanda,<br>RNAhybrid                           |
| <b><i>HMOX2</i></b>  | heme oxygenase (decycling) 2                                                                         | ENST00000570646.1        | RNAhybrid                                                   |
| <b><i>GSTA1</i></b>  | Glutathione-S-Transferase A1                                                                         | ENST00000334575.5        |                                                             |
| <b><i>NQO1</i></b>   | NAD(P)H dehydrogenase,<br>quinone 1                                                                  | ENST00000379047.3        |                                                             |
| <b><i>X-CT</i></b>   | solute carrier family 7,<br>(cationic amino acid<br>transporter, y <sup>+</sup> system)<br>member 11 | ENST00000280612.5        | TargetScan, MiRanda,<br>RNAhybrid<br>(conserved site)       |
| <b><i>GCLM</i></b>   | glutamate-cysteine ligase,<br>modifier subunit                                                       | ENST00000370238.3        | TargetScan, RNAhybrid                                       |
| <b><i>GCLC</i></b>   | glutamate-cysteine ligase,<br>catalytic subunit                                                      | ENSG00000001084.6        |                                                             |
| <b><i>SQSTM1</i></b> | sequestosome 1                                                                                       | ENST00000389805.4        |                                                             |

\* accession numbers correspond to those reported in TargetScan 7.1

### **Supplemental Tables S1**

**Bioinformatic analysis.** For the identification of miR-128 putative targets, three different algorithms were used, namely TargetScan release 7.1 (<http://www.targetscan.org>), miRanda (<http://www.microrna.org>) and RNAhybrid (<http://bibiserv.techfak.uni-bielefeld.de/rnahybrid/welcome.html>). The intersection of these programs indicated MAFG and Nrf2 as potential targets for miR-128.

**Supplemental Table S2:** Sequences of oligonucleotides used for this study

## HUMAN OLIGOS

|                           |                                       |
|---------------------------|---------------------------------------|
| F GSTA-1                  | 5'-GGGCTGACATTCACCTGGTG-3'            |
| R GSTA-1                  | 5'-TTCAGTGTGGGCAGGTTACTGA-3'          |
| F HMOX1                   | 5'-GGTGACCCGAGACGGCTT-3'              |
| R HMOX1                   | 5'-GCGAAGACTGGGCTCTCCT-3'             |
| F NQO1                    | 5'-CAGCTCACCGAGAGCCTAGT-3'            |
| R NQO1                    | 5'-TAGAGGTCCGACTCCACCAC-3'            |
| F NRF2                    | 5'-AACTACTCCCAGGTTGCCAC-3'            |
| R NRF2                    | 5'-GACCGGGAATATCAGGAACAAG-3'          |
| F p21 <sup>WAF1</sup>     | 5'-CTGGAGACTCTCAGGGTCGAA-3'           |
| R p21 <sup>WAF1</sup>     | 5'-CGGCGTTTGGAGTGGTAGAA-3'            |
| F x-CT                    | 5'-TGAAATCCCTGAACTTGCGAT-3'           |
| R c-CT                    | 5'-TCTGGATCCGGGCGCT-3'                |
| F $\beta$ 2-microglobulin | 5'-CCGTGGCCTTAGCTGTGCT-3'             |
| R $\beta$ 2-microglobulin | 5'-TCGGATGGATGAAACCCAGA-3'            |
| F c-ABL                   | 5'-TGGAGATAACACTCTAAGCATAACTAAAGGT-3' |
| R c-ABL                   | 5'-GATGTAGTTGCTTGGGACCCA-3'           |
| F AKR1D1                  | 5'-TTGAAGTACCCATGGCCTTT-3'            |
| R AKR1D1                  | 5'-TGAAATACGGATGGCACTCA-3'            |
| F ALDH3A1                 | 5'-GGAAGAGTCCCTGCTACGTG-3'            |
| R ALDH3A1                 | 5'-CCATAGTCCCGGATTTCTT-3'             |
| F CCDC53                  | 5'-CACAAATGGAGCACATCCTG-3'            |
| R CCDC53                  | 5'-AGCATCTGGCCTCTCAAGAA-3'            |
| F PCBD2                   | 5'-CCTTAAAGCAGCAGGATGGT-3'            |
| R PCBD2                   | 5'-TAGGGCAACTCGGGACATAA-3'            |
| F UCHL1                   | 5'-CCAGCATGAGAACTTCAGGA-3'            |
| R UCHL1                   | 5'-CACAGGAATTCCTCAATGGTC-3'           |

## MOUSE OLIGOS

|           |                                  |
|-----------|----------------------------------|
| F ATROGIN | 5'-CAGCAGCCTGAACTACGACG-3'       |
| R ATROGIN | 5'-GGCAGTCGAGAAGTCCAGTC-3'       |
| F MURF1   | 5'-ACCTGCTGGTGGAAAACATC-3'       |
| R MURF1   | 5'-CTTCGTGTTCTTGCACATC-3'        |
| F GAPDH   | 5'-AACATCAAATGGGGTGAGGCC-3'      |
| R GAPDH   | 5'-GTTGTCATGGATGACCTTGGC-3'      |
| F GCLC    | 5'-TGCGAAAAAAGTGCCCCGT-3'        |
| R GLCL    | 5'-TGCATTCCAAAACATCTGGAAA-3'     |
| F GSTA-1  | 5'-CAGGTGGCTCCTAGCTGCA-3'        |
| R GSTA-1  | 5'-GGTCTGCGCCAGCTTCA-3'          |
| F HMOX1   | 5'-AGGATTGTCTGAGGCCTTG-3'        |
| R HMOX1   | 5'-AGGAAGCCATCACCAGCTTA-3'       |
| F MAFG    | 5'-TGTGAGTGCCTGCTCACTGT-3'       |
| R MAFG    | 5'-GTCAAGCTGGTGCCATTCTC-3'       |
| F NQO1    | 5'-CCCTCAACATCTGGAGCCAT-3'       |
| R NQO1    | 5'-GCGTAGTTGAATGATGTCTTCTCTGA-3' |
| F NRF2    | 5'-GGCCCAGCATATCCAGACA-3'        |

|                       |                                        |
|-----------------------|----------------------------------------|
| R NRF2                | 5'-CCAGGGCAAGCGACTCAT-3'               |
| F p21 <sup>WAF1</sup> | 5'-CCACAGCGATATCCAGACATTTC-3'          |
| R p21 <sup>WAF1</sup> | 5'-CGAAGAGACAACGGCACACTT-3'            |
| F SQSTM1              | 5'-AGAATGTGGGGGAGAGTGTG-3'             |
| R SQSTM1              | 5'-TTTCTGGGGTAGTGGGTGTC-3'             |
| F x-CT                | 5'-TACCTCAACTTTATTACTGAAGAAGTAGACAA-3' |
| R x-CT                | 5'-TGTCAGTACGTAGCCCACTGTGA-3'          |
| F c-ABL               | 5'-GGTATGAAGGGAGGGTGTACCA-3'           |
| R c-ABL               | 5'-GTGAACTAACTCAGCCAGAGTGTTGA-3'       |
| F AKR1D1              | 5'-ATGGCGCCTATGTTTACCAC-3'             |
| R AKR1D1              | 5'-CATTGATGGGACATGCTCTG-3'             |
| F ALDH3A1             | 5'-CATCTGACCCCTGTCACCTT-3'             |
| R ALDH3A1             | 5'-CCCATAGTCATGGGACTGCT-3'             |
| F CCDC53              | 5'-AAAAGAACCGTGGCCTTTCT-3'             |
| R CCDC53              | 5'-ATTTGCTGAATCCGGAGAGA-3'             |
| F PCBD2               | 5'-TTCAGATGCACAGTGGTTGA-3'             |
| R PCBD2               | 5'-CATAAAGCCAAACGCCTGAT-3'             |
| F UCHL1               | 5'-GACCATCGGAAACTCCTGTG-3'             |
| R UCHL1               | 5'-GGACAGCTTCTCCGTTTCAG-3'             |

Supplementary FIGURE S1

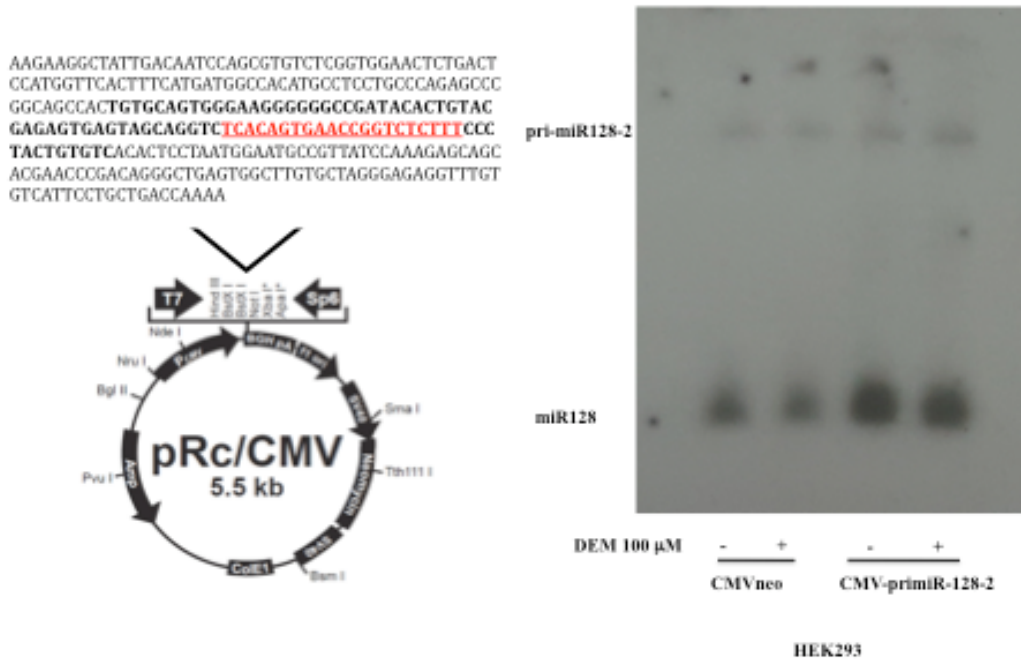

**Northern blot analysis of miR-128 expression.** Total RNA from HEK293 cells transfected for 48 h with pCMV-miR-128 or pCMVneo was isolated using TRIzol Reagent (ThermoFisher SCIENTIFIC) following manufacturer's instructions. Twenty micrograms of RNA were resolved on 15% polyacrylamide gel with urea 6M and transferred overnight to Hybond N<sup>+</sup> membrane (GE Healthcare Life Sciences). RNA was fixed by UV exposure (250 nm for 5'). After prehybridization, the membrane was incubated overnight with a probe generated using an oligonucleotide (AAAgAgaCCggTTCAGTgTgAggACAgAg) containing the mature anti-miR-128 and an extra-sequence complementary for annealing to the OprobAAA (5'-TTTTTTTTTCTCTgTCC 3') that was elongated with Klenow Polymerase (3'-5'exo<sup>-</sup>) (New England BioLabs) using  $\alpha$ (<sup>32</sup>P)-dATP (PerkinElmer Inc.) to produce a radioactive adenine tail.

Supplementary FIGURE S2

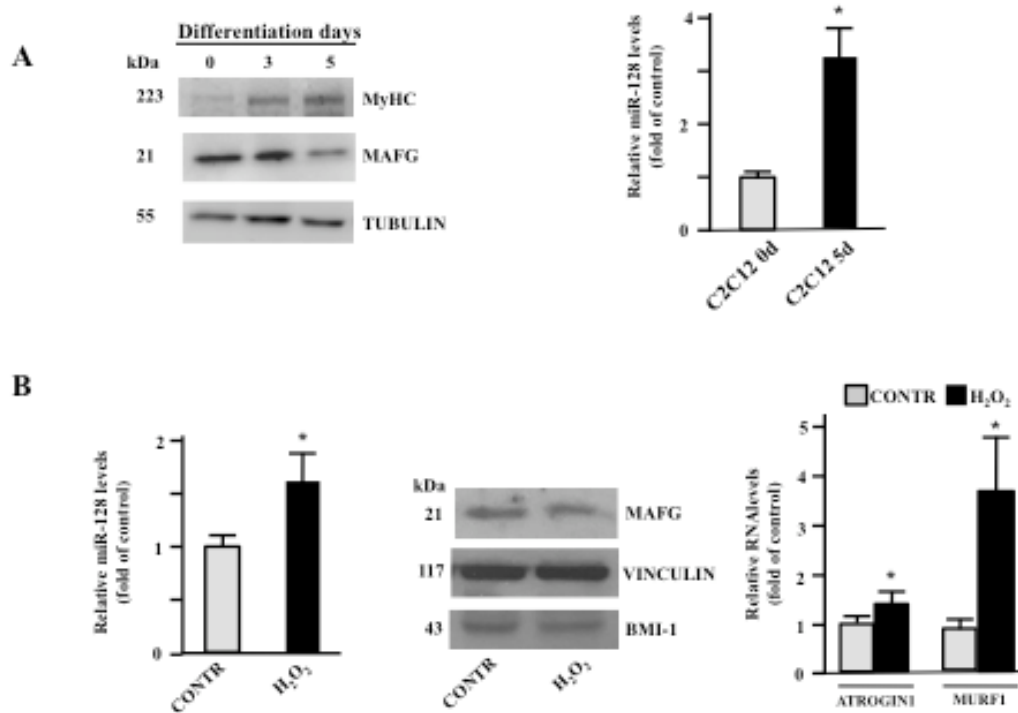

**Expression of MAFG under physiological/pathological conditions.** (A) Mouse C2C12 cells were cultured in DMEM supplemented with 20% FBS. To induce differentiation, medium was replaced to near-confluent cultures (about 80%) with DMEM containing 2% horse serum and cells cultured up to 5 days. Western Blotting analysis of MAFG protein levels was performed on total protein extracts; MyHC (Abcam, USA) was used as control of differentiation and Tubulin as a loading control. Analyses of miR-128 expression levels in control (C2C12 0d) and in 5 days-differentiated C2C12 cells (C2C12 5d) were performed by RT-qPCR as described in the Materials and Methods section of main text. (B) 4 days-differentiated C2C12 cells were treated or not with H<sub>2</sub>O<sub>2</sub> (100  $\mu$ M) for 24 h. RT-qPCR experiments for miR-128 levels and Western Blotting analyses for MAFG and BMI-1 protein levels were performed as in (A); Vinculin was used as a loading control. RT-qPCR analyses of ATROGIN1 and MURF1 mRNAs were used as controls of atrophic stimulation in differentiated cells. RT-qPCR assays were performed as (A) and GAPDH was used as internal control. The data are expressed as the mean  $\pm$  standard error and are representative of 3 independent experiments. \* $p < 0.05$ .
